# Supplementary material for: DITTO: An Explainable Machine-Learning Model for Transcript-Specific Variant Pathogenicity Prediction
Source: Preprints.org preprint supplement (doi:10.20944/preprints202404.0837.v1), 2024-04-12
Supplement: Supplementary file 1 [file supplementary]

## Sheet: Supp Table 1
Table S1: List of annotators used with their version and tags from OpenCRAVAT
Annotator	version used	variant effect prediction	cancer	non coding	genes	clinical relevance	variants	evolution	allele frequency	literature	functional studies	visualization
ALoFT	1.1.0	x					x
BioGRID	3.8.0				x
CADD	1.0.1	x
CADD Exome	1.6.1	x
Cancer Gene Census	85.0.12		x		x
Cancer Genome Interpreter	1.3.0		x			x
Candidate cis-Regulatory Elements by ENCODE (SCREEN)	1.0.1			x
CGD: Clinical Genomic Database	1.3.0				x
CHASMplus	1.3.0	x	x
CIViC	2023.04.01		x			x	x			x
ClinGen Gene	1.1.1				x	x
ClinPred	1.0.0	x				x	x
ClinVar	2023.02.01					x	x			x
COSMIC	94.0.0				x		x
COSMIC Gene	94.0.0		x		x
CScape	1.0.1	x	x	x
DANN	1.0.2	x
DANN Coding	1.0.0	x
dbscSNV	1.1.0	x
dbSNP	154.0.2						x			x
DGIdb: The Drug Interaction Database	1.0.0				x	x
Ensembl Regulatory Build	1.0.3			x
Essential Genes	3.5.8				x
ExAC Gene and CNV	0.4.0				x
FATHMM	2.3.7	x
FATHMM XF Coding	1.0.0	x		x
FunSeq2	1.0.1		x	x			x
Gene Ontology	2022.02.01				x
GeneHancer	1.1.0			x
GERP++	3.6.2						x	x
GHIS	3.6.0				x
gnomAD	2.2.0								x
gnomAD Gene	2.2.1				x
gnomAD3	1.1.0								x
GTEx eQTLs	7.0.4						x
GWAS Catalog	1.0.0			x		x	x			x
Likelihood Ratio Test	1.0.0	x
LINSIGHT	2021.01.08			x			x	x
LoFtool	3.6.1				x
MaveDB	1.0.1										x
MetaLR	1.0.3	x
MetaSVM	1.0.1	x
Mutation Assessor	3.1.0	x
MutationTaster	1.0.0	x
MutPred	1.4.0	x
MutPred-Indel	1.1.0	x
NCBI Gene	2022.08.30				x					x
NDEx Congenital Heart Disease	1.0.2		x		x		x
NDEx NCI Cancer Pathways	1.0.0				x							x
NDEx SIGNOR	1.0.2		x		x		x
OMIM	1.0.0					x	x
p(HI)	3.6.1				x
P(rec)	3.6.0				x
PangaloDB	1.0.0				x
Phast Cons	3.5.9						x	x
PhD-SNPg	0.0.9	x
PhyloP	3.5.10						x	x
PolyPhen-2	2022.10.13	x
PROVEAN: Protein Variant Effect Analyzer	1.1.0	x
Repeat Sequences	2020.10.16			x
REVEL	2022.11.29	x
RVIS	3.1.0				x
Segway	1.2.1			x			x
SIFT	1.2.0	x
SiPhy	3.5.5						x	x
SpliceAI	1.0.0	x
UniProt	2020.08.10									x
VARITY_R	1.0.0	x					x
VEST4	4.4.0	x					x

## Sheet: Supp Table 2
Table S2: Number of variants in Training and Testing datasets divided by high and low impact by consequence class
Consequence	Train		Test
	high impact	low impact	high impact	low impact
missense variant	32714	41669	10991	13941
stop gained	28119	297	9331	91
splice site variant	15790	243	5336	67
frameshift truncation	14658	231	4793	75
frameshift elongation	7818	175	2598	74
intron variant	2543	160229	873	53672
inframe deletion	956	703	295	242
start lost	888	54	276	12
synonymous variant	502	214433	181	71265
inframe insertion	318	464	112	138
complex substitution	231	157	66	58
3 prime UTR variant	202	13948	58	4703
exon loss variant	191	1	64	4
2kb upstream variant	166	3834	58	1253
stop lost	130	29	53	18
5 prime UTR variant	124	4357	38	1370
polymorphic pseudogene	97	158	26	43
processed transcript	12	9	3	3
transcript ablation	10	NaN	6	NaN
2kb downstream variant	7	707	3	203
NMD transcript variant	5	53	NaN	15
lnc RNA	2	4	NaN	1
stop retained variant	1	107	NaN	41
start retained variant	NaN	2	NaN	NaN

## Sheet: Supp Table 3
Table S3: Actual consequences of variants annotated with consequence category
Actual consequence	Consequence category
NMD_transcript_variant,synonymous_variant	synonymous
synonymous_variant	synonymous
2kb_downstream_variant,NMD_transcript_variant	intergenic
frameshift_elongation	frameshift elongation
processed_transcript	other RNA
stop_gained	stop gained
2kb_downstream_variant,miRNA	other RNA
2kb_downstream_variant,lnc_RNA	other RNA
intron_variant	intron
intron_variant,processed_transcript	intron
missense_variant	missense
frameshift_truncation	frameshift truncation
NMD_transcript_variant,3_prime_UTR_variant	3 prime UTR
3_prime_UTR_variant	3 prime UTR
5_prime_UTR_variant	5 prime UTR
2kb_downstream_variant,processed_transcript	other RNA
intron_variant,splice_site_variant	splice site
intron_variant,lnc_RNA	other RNA
2kb_upstream_variant,lnc_RNA	other RNA
2kb_upstream_variant	intergenic
2kb_upstream_variant,processed_transcript	other RNA
intron_variant,NMD_transcript_variant	intron
lnc_RNA	other RNA
NMD_transcript_variant,stop_gained	stop gained
missense_variant,NMD_transcript_variant	missense
2kb_downstream_variant,NSD_transcript	intergenic
2kb_downstream_variant	intergenic
complex_substitution,missense_variant	missense
complex_substitution,frameshift_truncation	frameshift truncation
complex_substitution,frameshift_truncation,NMD_transcript_variant	frameshift truncation
intron_variant,NMD_transcript_variant,splice_site_variant	splice site
2kb_upstream_variant,NMD_transcript_variant	intergenic
2kb_upstream_variant,misc_RNA	other RNA
complex_substitution,frameshift_elongation,intron_variant	frameshift elongation
2kb_downstream_variant,misc_RNA	other RNA
missense_variant,start_lost	start lost
NSD_transcript	other
NMD_transcript_variant,5_prime_UTR_variant	5 prime UTR
splice_site_variant	splice site
stop_retained_variant	stop retained
2kb_upstream_variant,miRNA	other RNA
inframe_insertion	inframe insertion
frameshift_truncation,NMD_transcript_variant	frameshift truncation
frameshift_elongation,NMD_transcript_variant	frameshift elongation
frameshift_truncation,stop_gained	frameshift truncation
inframe_deletion	inframe deletion
2kb_downstream_variant,snRNA	other RNA
2kb_upstream_variant,NSD_transcript	intergenic
inframe_deletion,NMD_transcript_variant	inframe deletion
frameshift_truncation,NMD_transcript_variant,stop_gained	frameshift truncation
missense_variant,start_lost,NMD_transcript_variant	start lost
2kb_upstream_variant,snRNA	other RNA
intron_variant,NSD_transcript	intron
frameshift_elongation,stop_gained	frameshift elongation
NMD_transcript_variant,splice_site_variant	splice site
frameshift_truncation,stop_lost	frameshift truncation
2kb_downstream_variant,snoRNA	other RNA
inframe_insertion,stop_gained	stop gained
ribozyme	other RNA
NSD_transcript,5_prime_UTR_variant	5 prime UTR
complex_substitution,frameshift_elongation	frameshift elongation
polymorphic_pseudogene,5_prime_UTR_variant	other RNA
polymorphic_pseudogene	other RNA
NMD_transcript_variant	other
frameshift_truncation,stop_lost,stop_retained_variant,3_prime_UTR_variant	frameshift truncation
2kb_downstream_variant,stop_lost	stop lost
complex_substitution,inframe_deletion	inframe deletion
complex_substitution	complex substitution
NMD_transcript_variant,stop_lost	stop lost
inframe_insertion,NMD_transcript_variant	inframe insertion
2kb_upstream_variant,ribozyme	other RNA
frameshift_elongation,NMD_transcript_variant,stop_gained	frameshift elongation
complex_substitution,stop_gained	stop gained
exon_loss_variant,frameshift_truncation	frameshift truncation
2kb_downstream_variant,stop_lost,3_prime_UTR_variant	stop lost
inframe_deletion,stop_gained	stop gained
polymorphic_pseudogene,3_prime_UTR_variant	other RNA
complex_substitution,missense_variant,NMD_transcript_variant	missense
snRNA	other RNA
2kb_upstream_variant,snoRNA	other RNA
exon_loss_variant,frameshift_truncation,NMD_transcript_variant	frameshift truncation
miRNA	other RNA
complex_substitution,inframe_insertion,intron_variant	complex substitution
stop_lost	stop lost
complex_substitution,frameshift_elongation,NMD_transcript_variant	frameshift elongation
exon_loss_variant,inframe_deletion	exon loss variant
frameshift_truncation,start_lost	frameshift truncation
complex_substitution,inframe_insertion,stop_gained	stop gained
misc_RNA	other RNA
NMD_transcript_variant,stop_retained_variant	stop retained
start_lost,5_prime_UTR_variant	start lost
complex_substitution,inframe_insertion,intron_variant,missense_variant	complex substitution
complex_substitution,frameshift_elongation,intron_variant,NMD_transcript_variant	frameshift elongation
complex_substitution,inframe_insertion,intron_variant,NMD_transcript_variant	complex substitution
intron_variant,polymorphic_pseudogene	other RNA
2kb_downstream_variant,intron_variant,stop_lost,3_prime_UTR_variant	stop lost
complex_substitution,inframe_insertion	complex substitution
start_retained_variant	start retained
2kb_upstream_variant,rRNA	other RNA
complex_substitution,inframe_deletion,missense_variant	complex substitution
snoRNA	other RNA
inframe_insertion,NMD_transcript_variant,stop_gained	stop gained
complex_substitution,synonymous_variant	complex substitution
NMD_transcript_variant,stop_lost,3_prime_UTR_variant	stop lost
frameshift_elongation,stop_lost	frameshift elongation

## Sheet: Supp Table 4
Table S4: Variant count across variant consequence class and per chromosome
chrom	missense	splice site	start lost	stop gained	synonymous	intergenic	intron	other RNA	3 prime UTR	5 prime UTR	frameshift elongation	frameshift truncation	inframe deletion	inframe insertion	start retained	stop lost	stop retained	complex substitution	exon loss variant	other	Total	Total chromosome length (bp)
chr1	400	65	5	163	708	80	618	462	105	28	36	109	6	1						6	2786	248956422
chr2	325	115	4	169	1097	106	816	447	137	94	120	210	5	2				1			3647	242193529
chr3	247	64	5	73	446	138	358	209	145	20	52	91	4	2		1			2		1855	198295559
chr4	141	20	2	44	286	16	252	119	60	16	26	39	2	1			1	2			1025	190214555
chr5	168	47	5	115	422	117	366	218	314	24	44	103	4	3		1	2				1953	181538259
chr6	173	42	3	101	306	46	288	111	63	10	26	59	9	7							1244	170805979
chr7	184	58	1	90	444	55	345	235	93	25	37	101	4	3				2			1675	159345973
chr8	117	35	2	67	247	62	210	68	110	18	19	50	1	1							1007	145138636
chr9	168	39	2	72	447	100	375	314	102	21	30	47	7	5	1						1730	138394717
chr10	143	31	1	61	320	41	359	127	58	17	29	36	3	1							1227	133797422
chr11	241	77	7	152	542	124	455	285	86	18	78	139	10	4		1		2			2219	135086622
chr12	294	36	2	73	505	41	391	232	73	23	26	70	7	2				1		1	1775	133275309
chr13	99	33		167	150	15	245	366	26	4	164	338	1	2				1			1610	114364328
chr14	123	14		46	362	48	225	148	40	26	18	33	3	1				1			1087	107043718
chr15	178	36	7	64	263	40	229	204	71	10	26	62	4	1				1		2	1195	101991189
chr16	185	62	3	112	490	143	470	374	116	14	38	132	12			3		1			2154	90338345
chr17	316	144	4	190	584	184	778	204	126	76	161	375	13	1				1		11	3156	83257441
chr18	63	10	1	30	136	20	148	92	20	6	9	19		1							555	80373285
chr19	247	36	2	73	528	130	393	210	105	12	30	52	7	3			2	1		8	1830	58617616
chr20	74	10	1	16	137	28	141	132	36	9	10	18	2							2	614	64444167
chr21	46	15	3	16	81	11	81	73	26	5	10	17		1							385	46709983
chr22	85	28		35	118	45	195	107	38	12	13	22	2	1						5	701	50818468
chrX	294	47	4	125	418	53	329	120	55	18	22	49	8	4							1546	156040895
Total	4311	1064	64	2054	9037	1643	8067	4857	2005	506	1024	2171	114	47	1	6	5	14	2	35	36976

## Sheet: Supp Table 5
Table S5: F1 scores overall by chromosome, by consequence class and across variant consequences and per chromosome
								overall by chromosome
	chr1	chr2	chr3	chr4	chr5	chr6	chr7	chr8	chr9	chr10	chr11	chr12	chr13	chr14	chr15	chr16	chr17	chr18	chr19	chr20	chr21	chr22	chrX
DITTO	0.98	0.99	0.99	0.98	0.99	0.98	0.98	0.98	0.98	0.97	0.98	0.98	0.99	0.97	0.98	0.98	0.98	0.97	0.98	0.94	0.98	0.99	0.97
CADD	0.71	0.19	0.71	0.67	0.65	0.72	0.62	0.74	0.64	0.7	0.63	0.74	0.51	0.75	0.72	0.61	0.52	0.72	0.51	0.68	0.71	0.76	0.79
ClinPred	0.5	0.34	0.51	0.37	0.27	0.34	0.43	0.28	0.38	0.43	0.41	0.63	0.14	0.57	0.52	0.3	0.33	0.37	0.59	0.5	0.48	0.48	0.6
MetaSVM	0.42	0.31	0.4	0.3	0.22	0.23	0.37	0.18	0.33	0.38	0.37	0.56	0.13	0.49	0.49	0.23	0.27	0.34	0.54	0.43	0.42	0.43	0.5
GERP	0.4	0.41	0.45	0.34	0.35	0.41	0.43	0.38	0.31	0.34	0.49	0.4	0.67	0.33	0.45	0.38	0.59	0.31	0.34	0.28	0.38	0.38	0.5
spliceai	0.23	0.28	0.29	0.28	0.27	0.25	0.29	0.35	0.28	0.26	0.3	0.21	0.11	0.19	0.26	0.29	0.28	0.26	0.22	0.27	0.31	0.35	0.27
Revel	0.36	0.19	0.32	0.23	0.14	0.24	0.16	0.15	0.23	0.33	0.28	0.52	0.11	0.43	0.44	0.16	0.19	0.18	0.35	0.35	0.32	0.32	0.38
DANN	0.4	0.42	0.43	0.34	0.35	0.39	0.42	0.36	0.32	0.34	0.46	0.39	0.66	0.32	0.44	0.39	0.58	0.32	0.35	0.29	0.36	0.38	0.48
SIFT	0.33	0.39	0.39	0.32	0.33	0.37	0.39	0.36	0.29	0.29	0.43	0.28	0.65	0.26	0.36	0.36	0.53	0.29	0.27	0.23	0.34	0.33	0.42
								overall by variant consequences
	missense	stop lost	stop gained	start lost	synonymous	splice site	frameshift truncation	frameshift elongation	complex substitution	exon loss variant	inframe insertion	inframe deletion	intron	3 prime UTR	5 prime UTR	other RNA	intergenic	other
DITTO	0.98	0.86	1	0.98	0.86	1	1	1	0.96	1	0.6	0.84	0.89	0.97	0.92	0.95	0.94	1
CADD	0.72	0.89	0.98	0.97	0.08	0.98	0.01	0.08	0.14	1	0.32	0.69	0.71	0.81	0.4	0.53	0.72	0.8
ClinPred	0.97	0	0.08	0.97	0.26	0.01	0	0	0	0	0	0	0.28	0.57	0.27	0.58	0.46	0.93
MetaSVM	0	0	0	0	0	0	0	0	0	0	0	0	0	0	0	0	0	0
GERP	0	0	0	0	0	0	0	0	0	1	0.32	0.69	0	0	0	0	0	0
spliceai	0.07	0	0.04	0.03	0.54	0.97	0	0	0	0	0	0	0.63	0.17	0.03	0.29	0.34	0.22
Revel	0.82	0	0	0.64	0	0	0	0	0	0	0	0	0	0.02	0	0.01	0	0
DANN	0.59	0.8	0.89	0.89	0.01	0.89	1	0.93	0.96	1	0.32	0.69	0.11	0.22	0.24	0.23	0.17	0.31
SIFT	0.16	0.8	0.99	0.28	0.01	0.99	1	1	0.96	1	0.32	0.69	0.12	0.21	0.23	0.23	0.18	0.28
											intergenic
	chr1	chr2	chr3	chr4	chr5	chr6	chr7	chr8	chr9	chr10	chr11	chr12	chr13	chr14	chr15	chr16	chr17	chr18	chr19	chr20	chr21	chr22	chrX
DITTO	0.8	0.96	0.97	1	1	0.92	0.83	1	0.95	1	0.97	0.67	0.67	0.86	0.89	0.96	0.98	1	0.92	0.5	1	0.92	0.94
ClinPred	0.67	0.25	0.42	1	0	0.67	0.8	0.33	0.19	1	0.48	0	0	0.67	0.57	0.62	0.28	1	0.73	0	1	0.6	0.62
MetaSVM	0.6	0.25	0.42	0	0.02	0.36	0.73	0.33	0.17	0	0.48	0	0	0.67	0.25	0.5	0.26	0	0.8	0.08	0	0.6	0.56
VEST	0.16	0.22	0.23	0.12	0.02	0.23	0.2	0.12	0.32	0	0.23	0.05	0.24	0.12	0.22	0.14	0.28	0	0.09	0.07	0	0.27	0.26
Revel	0	0	0	0	0	0	0	0	0	1	0	0	0	0	0	0	0	1	0	0	1	0	0
CADD	0.82	0.83	0.82	0.2	0.2	0.71	0.63	0.8	0.19	0	0.78	0.4	0.29	0.67	0.44	0.61	0.89	0	0.71	0.22	0	0.8	0.44
GERP	0.17	0.18	0.23	0.13	0.02	0.24	0.17	0.1	0.31	0	0.23	0.05	0.25	0.12	0.24	0.14	0.29	0	0.08	0.07	0	0.21	0.29
DANN	0.13	0.19	0.22	0.12	0.02	0.21	0.12	0.14	0.38	0	0.25	0.05	0.15	0.13	0.12	0.13	0.23	0	0.07	0.07	0	0.15	0.23
SIFT	0.16	0.22	0.23	0.12	0.02	0.23	0.2	0.12	0.32	0	0.23	0.05	0.24	0.12	0.22	0.14	0.28	0	0.09	0.07	0	0.27	0.26
spliceai	0.25	0.27	0.36	0	0	0	0.29	0.4	0	1	0.55	0	0.67	0.5	0.57	0.5	0.38	1	0.29	1	1	0	0.4
											intron
	chr1	chr2	chr3	chr4	chr5	chr6	chr7	chr8	chr9	chr10	chr11	chr12	chr13	chr14	chr15	chr16	chr17	chr18	chr19	chr20	chr21	chr22	chrX
DITTO	0.9	0.91	0.89	0.95	0.88	0.83	0.91	0.83	0.95	0.76	0.83	0.79	0.9	0.84	0.9	0.83	0.93	0.4	0.86	0.91	0.57	1	0.91
ClinPred	0.21	0.26	0.31	0.31	0.3	0	0.09	0.17	0.33	0.29	0.23	0.4	0.22	0.36	0.33	0.11	0.2	0	0.76	0	0.4	0	0.31
MetaSVM	0.2	0.25	0.27	0.15	0.29	0	0.07	0	0.33	0.27	0.26	0.35	0.22	0.31	0.24	0.08	0.13	0.03	0.74	0	0.29	0.05	0.25
VEST	0.1	0.09	0.12	0.16	0.09	0.04	0.12	0.1	0.1	0.1	0.15	0.08	0.12	0.07	0.12	0.07	0.22	0.03	0.11	0.07	0.07	0.05	0.22
Revel	0	0	0	0	0	0	0	0	0	0	0	0	0	0	0	0	0	0	0	0	0	0	0
CADD	0.74	0.6	0.64	0.77	0.62	0.3	0.78	0.64	0.86	0.53	0.63	0.73	0.77	0.48	0.78	0.71	0.8	0.08	0.15	0.56	0.17	0.67	0.69
GERP	0.1	0.09	0.12	0.14	0.09	0.04	0.12	0.1	0.1	0.1	0.15	0.08	0.12	0.07	0.12	0.07	0.22	0.03	0.1	0.07	0.07	0.05	0.22
DANN	0.1	0.08	0.11	0.14	0.1	0.05	0.13	0.11	0.09	0.1	0.12	0.08	0.13	0.05	0.1	0.07	0.21	0.02	0.13	0.08	0.06	0.05	0.2
SIFT	0.1	0.09	0.12	0.16	0.09	0.04	0.12	0.1	0.1	0.1	0.15	0.08	0.12	0.07	0.12	0.07	0.22	0.03	0.11	0.07	0.07	0.05	0.22
spliceai	0.62	0.59	0.48	0.67	0.74	0.55	0.75	0.78	0.67	0.48	0.71	0.58	0.58	0.77	0.75	0.69	0.61	0.4	0.22	0.67	0.5	0.8	0.62
											missense
	chr1	chr2	chr3	chr4	chr5	chr6	chr7	chr8	chr9	chr10	chr11	chr12	chr13	chr14	chr15	chr16	chr17	chr18	chr19	chr20	chr21	chr22	chrX
DITTO	0.99	0.97	0.98	0.97	0.99	0.96	0.99	0.96	0.95	0.98	0.99	0.99	0.97	0.97	0.99	0.97	0.97	0.97	0.98	0.96	1	0.99	0.96
ClinPred	0.96	0.96	0.97	0.98	0.94	0.96	0.98	0.96	0.92	0.97	0.99	0.98	0.95	0.98	0.98	0.96	0.97	0.86	0.98	0.98	1	0.95	0.97
MetaSVM	0.85	0.91	0.82	0.89	0.8	0.73	0.86	0.74	0.79	0.88	0.93	0.89	0.88	0.92	0.94	0.82	0.89	0.87	0.88	0.88	0.94	0.93	0.87
VEST	0.82	0.81	0.84	0.61	0.62	0.71	0.83	0.6	0.64	0.81	0.89	0.88	0.82	0.88	0.85	0.77	0.89	0.63	0.83	0.75	0.73	0.79	0.86
Revel	0.86	0.8	0.82	0.83	0.75	0.82	0.61	0.78	0.79	0.87	0.84	0.92	0.88	0.89	0.95	0.72	0.77	0.65	0.73	0.81	0.94	0.86	0.79
CADD	0.78	0.75	0.8	0.55	0.56	0.64	0.77	0.52	0.65	0.73	0.85	0.82	0.78	0.82	0.85	0.75	0.88	0.58	0.82	0.68	0.74	0.78	0.84
GERP	0.67	0.63	0.71	0.41	0.45	0.5	0.69	0.38	0.53	0.62	0.77	0.75	0.74	0.73	0.74	0.6	0.83	0.49	0.71	0.57	0.59	0.68	0.75
DANN	0.6	0.57	0.65	0.34	0.38	0.43	0.57	0.35	0.49	0.55	0.61	0.68	0.64	0.65	0.64	0.52	0.74	0.45	0.64	0.53	0.56	0.62	0.68
SIFT	0.17	0.21	0.26	0.07	0.14	0.05	0.33	0.15	0.11	0.04	0.19	0.04	0.13	0.21	0.02	0.13	0.06	0.19	0.19	0.09	0.07	0.15	0.3
spliceai	0.01	0.08	0.09	0.12	0.09	0.07	0.07	0	0	0.03	0.08	0.05	0.14	0.08	0.06	0.11	0.12	0.18	0.04	0.07	0	0.05	0.06
											splice site
	chr1	chr2	chr3	chr4	chr5	chr6	chr7	chr8	chr9	chr10	chr11	chr12	chr13	chr14	chr15	chr16	chr17	chr18	chr19	chr20	chr21	chr22	chrX
DITTO	1	1	1	1	1	0.99	0.99	0.99	1	1	1	0.99	1	1	1	0.99	0.99	1	1	1	1	1	1
ClinPred	0	0	0	0	0	0	0	0	0	0	0	0.05	0	0.13	0	0	0	0	0	0.18	0	0	0
MetaSVM	0.99	0.99	0	0	0	0	0	0	0	0	0.03	0.05	0	0.96	0	0	0	0	1	0.18	0	0	0
VEST	0.98	0.99	0.98	1	0.99	0.99	0.99	0.97	1	1	1	1	1	1	1	0.98	0.99	1	0.99	1	1	1	1
Revel	0	0	0	0	0	0	0	0	0	0	0	0	0	0	0	0	0	0	0	0	0	0	0
CADD	0.97	0.98	0.98	0.95	0.98	0.98	0.98	0.99	0.96	0.98	0.99	0.99	0.98	0.92	0.97	0.97	0.98	0.67	0.99	0.89	0.5	0.96	0.99
GERP	0.8	0.98	0.99	0.71	1	0.86	0.96	0.94	0.84	0.97	0.9	0.82	0.88	0.78	0.78	0.86	0.97	0.75	1	0.82	0.7	0.76	0.92
DANN	0.89	0.93	0.83	0.86	0.93	0.86	0.9	0.79	0.96	0.93	0.89	0.88	0.84	0.92	0.91	0.88	0.89	0.95	0.93	0.89	0.89	0.96	0.88
SIFT	0.98	0.99	0.98	1	0.99	0.99	0.99	0.97	1	1	1	1	1	1	1	0.98	0.99	1	0.99	1	1	1	1
spliceai	0.95	0.96	0.97	0.92	0.96	0.96	0.96	0.99	0.93	0.95	0.98	0.99	0.98	0.92	0.97	0.94	0.98	1	0.99	1	1	0.96	0.99
											3 prime UTR
	chr1	chr2	chr3	chr4	chr5	chr6	chr7	chr8	chr9	chr10	chr11	chr12	chr13	chr14	chr15	chr16	chr17	chr18	chr19	chr20	chr21	chr22	chrX
DITTO	1	1	1	0.91	0.9	1	0.97	0.91	1	0.93	0.97	1	1	1	0.96	1	0.97	1	1	0.8	1	0.95	0.95
ClinPred	0.36	0.67	0.82	0.33	0.57	0.67	0.57	0.29	0.71	0.83	0.62	0.5	1	0.75	0.71	0.5	0.21	0	0	0.5	1	0.5	0.74
MetaSVM	0.29	0.65	0.58	0.15	0.48	0.67	0.52	0.18	0.46	0.73	0.56	0.5	0	0.6	0.59	0.25	0.05	0.22	0.14	0.8	1	0.36	0.52
VEST	0.29	0.3	0.33	0.15	0.08	0.12	0.28	0.1	0.15	0.22	0.35	0.15	0	0.22	0.27	0.14	0.38	0.18	0.12	0.11	0.07	0.38	0.31
Revel	0	0	0	0	0	0.4	0	0	0	0	0	0.29	1	0	0	0	0	0	0	0	0	0	0
CADD	0.84	0.83	0.89	0.56	0.74	0.62	0.81	0.67	0.73	0.8	0.81	1	0	0.5	0.74	0.62	0.64	0.4	0.57	0.67	0.4	0.8	0.69
GERP	0.27	0.27	0.33	0.16	0.08	0.13	0.23	0.11	0.13	0.22	0.36	0.15	0	0.24	0.23	0.15	0.38	0.19	0.11	0.11	0.08	0.37	0.31
DANN	0.34	0.31	0.32	0.15	0.08	0.13	0.22	0.08	0.13	0.17	0.37	0.19	0	0.17	0.27	0.17	0.4	0.27	0.15	0.12	0.09	0.39	0.19
SIFT	0.29	0.3	0.34	0.16	0.08	0.09	0.28	0.1	0.15	0.22	0.35	0.13	0	0.22	0.27	0.14	0.38	0.18	0.12	0.11	0.07	0.38	0.31
spliceai	0.2	0.08	0.24	0.33	0.27	0	0	0.29	0	0	0.29	0.29	1	0	0.31	0.36	0.12	0	0	0	0	0	0.18
											5 prime UTR
	chr1	chr2	chr3	chr4	chr5	chr6	chr7	chr8	chr9	chr10	chr11	chr12	chr13	chr14	chr15	chr16	chr17	chr18	chr19	chr20	chr21	chr22	chrX
DITTO	0.67	1	1	1	0	1	1	0.67	1	0.8	1	1	0	0.67	1	1	0.97	1	1	1	1	1	0.5
ClinPred	0	0	0.5	0	1	0	1	0	0.5	0	0	1	0	0	0	0	0.21	1	1	1	1	0.67	0
MetaSVM	0.07	0.04	0.5	0.12	1	0.29	0	0	0.19	0.32	0	1	0.5	0.16	0	0.27	0.2	0	0	1	0	0.67	0
VEST	0.07	0.04	0.46	0.12	0	0.18	0	0.11	0.25	0.3	0.11	0.16	0.4	0.14	0.18	0.25	0.63	0	0	0	0	0.29	0.11
Revel	0	0	0	0	1	0	1	0	0	0	0	0	0	0	0	0	0	1	1	1	1	0	0
CADD	0.12	1	0.6	0	0	0	0	0.67	0.5	0.5	0.67	0.4	1	0.33	1	0.67	0.25	0	0	0	0	0.5	0.33
GERP	0.07	0.04	0.42	0.12	1	0.22	0	0	0.26	0.21	1	0.8	0.5	0.15	1	0.29	0.64	0	0	1	0	0.15	0
DANN	0.08	0.05	0.36	0.15	0	0.2	0	0.11	0.3	0.33	0.14	0	0.67	0.1	0.2	0.27	0.67	0	0	0	0	0.31	0
SIFT	0.07	0.04	0.46	0.12	0	0.18	0	0.11	0.25	0.3	0.11	0.16	0.4	0.14	0.18	0.25	0.63	0	0	0	0	0.29	0.11
spliceai	0	0	0	0	1	0	1	0	0.5	0	0	0	0	0	0	0	0	1	1	1	1	0	0
											frameshift truncation
	chr1	chr2	chr3	chr4	chr5	chr6	chr7	chr8	chr9	chr10	chr11	chr12	chr13	chr14	chr15	chr16	chr17	chr18	chr19	chr20	chr21	chr22	chrX
DITTO	1	1	1	1	1	0.99	1	1	1	0.99	1	0.99	1	1	1	1	1	1	1	1	1	1	1
ClinPred	0	0	0	0	0	0	0	0	0	0	0	0	0	0	0	0	0	0	0	0	0	0	0
MetaSVM	0	0	0	0	0	0	0	0	0	0	0	0	0	0	0	0	0	0	0	0	0	0	0
VEST	1	1	1	1	1	0.99	1	1	1	0.99	0.99	0.99	1	1	1	1	1	1	1	1	1	1	1
Revel	0	0	0	0	0	0	0	0	0	0	0	0	0	0	0	0	0	0	0	0	0	0	0
CADD	0	0.01	0	0	0.02	0.03	0.04	0.04	0	0	0	0	0.02	0	0	0.02	0.02	0	0.04	0.97	0	0	0
GERP	0	1	0	0	0.02	0.98	0.02	0.99	0	0	0	0	1	0	0	1	0.99	0	0.98	0	0	0	0
DANN	1	1	1	1	1	0.98	1	1	1	0.99	0.99	0.99	1	1	1	1	0.99	1	0.98	0.97	1	1	1
SIFT	1	1	1	1	1	0.99	1	1	1	0.99	0.99	0.99	1	1	1	1	1	1	1	1	1	1	1
spliceai	0	0	0	0	0	0	0	0	0	0	0	0	0	0	0	0	0	0	0	0	0	0	0
											Other RNA
	chr1	chr2	chr3	chr4	chr5	chr6	chr7	chr8	chr9	chr10	chr11	chr12	chr13	chr14	chr15	chr16	chr17	chr18	chr19	chr20	chr21	chr22	chrX
DITTO	0.92	0.98	0.97	0.96	1	0.97	0.98	0.95	0.93	0.92	0.91	0.99	0.95	0.82	0.97	0.98	0.93	0.95	0.95	0.77	0.96	1	0.96
ClinPred	0.61	0.47	0.43	0.63	0.55	0.5	0.87	0.46	0.59	0.5	0.59	0.85	0.26	0.4	0.67	0.29	0.63	0.71	0.73	0.6	0.74	0.73	0.79
MetaSVM	0.54	0.42	0.35	0.55	0.34	0.43	0.71	0.31	0.52	0.31	0.5	0.71	0.18	0.37	0.59	0.2	0.51	0.67	0.65	0.43	0.64	0.55	0.67
VEST	0.24	0.41	0.31	0.2	0.18	0.27	0.23	0.26	0.16	0.09	0.2	0.27	0.17	0.13	0.18	0.2	0.28	0.18	0.17	0.14	0.28	0.12	0.44
Revel	0.03	0.02	0	0	0	0	0	0	0	0	0	0.05	0	0	0	0	0	0	0	0	0	0	0
CADD	0.75	0.51	0.71	0.71	0.78	0.91	0.79	0.64	0.64	0.43	0.64	0.76	0.92	0.61	0.77	0.86	0.67	0.8	0.66	0.51	0.8	0.48	0.69
GERP	0.24	0.42	0.31	0.2	0.18	0.27	0.23	0.28	0.14	0.08	0.2	0.27	0.17	0.13	0.17	0.2	0.28	0.19	0.16	0.15	0.27	0.13	0.46
DANN	0.23	0.41	0.31	0.17	0.16	0.26	0.24	0.23	0.18	0.09	0.18	0.27	0.17	0.08	0.2	0.19	0.28	0.14	0.15	0.16	0.25	0.13	0.42
SIFT	0.24	0.41	0.31	0.2	0.18	0.27	0.23	0.26	0.16	0.09	0.2	0.27	0.17	0.13	0.18	0.2	0.28	0.18	0.17	0.14	0.29	0.12	0.44
spliceai	0.31	0.32	0.34	0.38	0.34	0.2	0.12	0.75	0.31	0.67	0.36	0.1	0.16	0.18	0.1	0.35	0.22	0.18	0.42	0.17	0.15	0.25	0.3
											Stop gained
	chr1	chr2	chr3	chr4	chr5	chr6	chr7	chr8	chr9	chr10	chr11	chr12	chr13	chr14	chr15	chr16	chr17	chr18	chr19	chr20	chr21	chr22	chrX
DITTO	0.99	1	1	1	1	1	1	0.99	1	1	0.99	0.99	1	1	0.99	1	1	1	0.99	1	1	0.99	1
ClinPred	0.07	0.09	0.2	0.13	0.03	0	0.13	0.11	0	0.06	0.06	0	0.01	0.3	0.03	0.04	0.15	0.12	0	0	0.12	0.22	0.18
MetaSVM	0.01	1	0.99	0	0	0	0	0	0.99	0	0.99	0	0	0	0.98	0	0	0	0	0	1	0.94	1
VEST	0.96	0.98	0.95	0.94	0.94	0.96	0.97	0.94	0.98	0.96	0.97	0.97	1	0.92	0.94	0.96	0.98	0.82	0.9	1	0.86	0.94	0.98
Revel	0	0	0	0	0	0	0	0	0	0	0	0	0	0	0	0	0	0	0	0	0	0	0
CADD	0.56	0.56	0.99	0.34	0.99	0.99	0.96	0.98	0.99	0.98	0.98	0.84	0.96	0.99	0.48	0.98	0.91	0.33	0.97	0.97	1	0.97	0.97
GERP	0.97	0.98	0.96	0.95	0.97	0.98	0.99	0.99	0.92	0.89	0.97	0.98	0.97	0.94	0.96	0.94	0.98	0.98	0.94	0.93	0.86	0.92	0.99
DANN	0.91	0.92	0.84	0.89	0.9	0.91	0.88	0.85	0.89	0.9	0.9	0.85	0.86	0.93	0.87	0.86	0.92	0.93	0.9	0.97	0.67	0.76	0.91
SIFT	0.99	1	0.99	1	1	1	0.99	1	0.98	0.99	0.99	0.99	1	1	0.99	0.99	1	1	0.99	1	0.97	0.97	1
spliceai	0.02	0.02	0.11	0	0.02	0.02	0.04	0.03	0.03	0	0.05	0.08	0.01	0	0.03	0.05	0.06	0.06	0.05	0	0	0.22	0.03
											Synonymous
	chr1	chr2	chr3	chr4	chr5	chr6	chr7	chr8	chr9	chr10	chr11	chr12	chr13	chr14	chr15	chr16	chr17	chr18	chr19	chr20	chr21	chr22	chrX
DITTO	1	1	0	1	1	1	1	1	1	1	1	1	1	1	1	1	0.77	0.67	0	1	1	1	0.67
ClinPred	1	1	0	1	0	1	1	0	1	1	0	0	0	0	0	1	0.5	0	0	1	1	1	1
MetaSVM	1	0	0	1	0.01	1	0	0	0	1	0.03	0	0	0.01	0	0	0.29	0	0	0	1	1	0
VEST	0	0	0	0	0.01	0	0	0.01	0	0	0.03	0	0.01	0.01	0.01	0	0.02	0.01	0	0	0	0	0
Revel	0	1	0	1	0	1	1	0	1	1	0	0	0	0	0	1	0	0	0	1	1	1	0
CADD	0.04	0	0.01	0	0.1	0	0	0.12	0	0	0.88	0.02	0.29	0.07	0.06	0	0.23	0.18	0.02	0	0	0	0.08
GERP	0	0	0	0	0.01	0	0	0.01	0	0	0.03	0	0	0.01	0	0	0.02	0	0	0	1	1	0.67
DANN	0	0	0.01	0	0	0	0	0	0	0	0.03	0	0	0.01	0.01	0	0.02	0.02	0	0	0	0	0.01
SIFT	0	0	0	0	0.01	0	0	0.01	0	0	0.03	0	0.01	0.01	0	0	0.02	0.02	0	0	0	0	0.01
spliceai	0	1	0.67	0	0.8	1	1	0	1	0	0.67	1	1	0	1	0	0.62	1	0.29	0	1	1	0

## Sheet: Supp Table 6
Table S6: Number of NF1 LOVD variants reclassified by DITTO
original class	DITTO class	number of variants
B/LB	Likely Benign	202
B/LB	Likely Pathogenic	2
Conflicts	Likely Benign	116
Conflicts	Likely Pathogenic	84
Conflicts	Uncertain	7
P/LP	Likely Benign	4
P/LP	Likely Pathogenic	725
P/LP	Uncertain	4
Unknown	Likely Benign	294
Unknown	Likely Pathogenic	1589
Unknown	Uncertain	67
VUS	Likely Benign	242
VUS	Likely Pathogenic	333
VUS	Uncertain	90

## Sheet: Supp Table 7
Table S7: Example variants with different transcript impact and DITTO scores
TranscriptID	Gene	Consequence	Chr	Position	REF	ALT	DITTO
ENST00000580852	MIR4281	2kb_upstream_variant,miRNA	chr5	176629656	C	A	0.120741
ENST00000310112	SNCB	5_prime_UTR_variant	chr5	176629656	C	A	0.33163
ENST00000393693	SNCB	5_prime_UTR_variant	chr5	176629656	C	A	0.33163
ENST00000506696	SNCB	5_prime_UTR_variant	chr5	176629656	C	A	0.33163
ENST00000510387	SNCB	5_prime_UTR_variant	chr5	176629656	C	A	0.33163
ENST00000614675	SNCB	5_prime_UTR_variant	chr5	176629656	C	A	0.89147
ENST00000510473	EIF4E1B	2kb_upstream_variant,processed_transcript	chr5	176629656	C	A	0.93527
ENST00000647833	EIF4E1B	2kb_upstream_variant	chr5	176629656	C	A	0.997385
ENST00000318682	EIF4E1B	2kb_upstream_variant	chr5	176629656	C	A	0.997385
ENST00000506348	CDHR2	missense_variant	chr5	176584512	T	C	0.560447
ENST00000510636	CDHR2	missense_variant	chr5	176584512	T	C	0.790895
ENST00000261944	CDHR2	missense_variant	chr5	176584512	T	C	0.97077
ENST00000436713	MED8-AS1	2kb_upstream_variant,lnc_RNA	chr1	43384485	C	G	0.314313
ENST00000372457	MED8	3_prime_UTR_variant	chr1	43384485	C	G	0.919122
ENST00000372455	MED8	2kb_downstream_variant	chr1	43384485	C	G	0.99727
ENST00000290663	MED8	missense_variant	chr1	43384485	C	G	1
ENST00000641319	PPT1	missense_variant	chr1	40080486	G	C	0
ENST00000641471	PPT1	missense_variant	chr1	40080486	G	C	0
ENST00000642050	PPT1	missense_variant	chr1	40080486	G	C	0
ENST00000641924	PPT1	NMD_transcript_variant,synonymous_variant	chr1	40080486	G	C	5.36442e-07
ENST00000433473	PPT1	missense_variant	chr1	40080486	G	C	3.09944e-06
ENST00000530076	PPT1	5_prime_UTR_variant	chr1	40080486	G	C	3.6478e-05
ENST00000449045	PPT1	missense_variant	chr1	40080486	G	C	3.92795e-05
ENST00000372775	PPT1	2kb_upstream_variant,processed_transcript	chr1	40080486	G	C	0.000163794
ENST00000530704	PPT1	NMD_transcript_variant,3_prime_UTR_variant	chr1	40080486	G	C	0.00020355
ENST00000641691	PPT1	NMD_transcript_variant,3_prime_UTR_variant	chr1	40080486	G	C	0.00020355
ENST00000439754	PPT1	missense_variant	chr1	40080486	G	C	0.000461221
ENST00000372779	PPT1	NMD_transcript_variant,3_prime_UTR_variant	chr1	40080486	G	C	0.702876
ENST00000529905	PPT1	missense_variant,NMD_transcript_variant	chr1	40080486	G	C	0.914462
ENST00000207457	TEKT2	intron_variant	chr1	36085705	A	T	1.01328e-06
ENST00000469024	TEKT2	NMD_transcript_variant,stop_gained	chr1	36085705	A	T	0.999963
